# Supplementary material
Source: PubMed Central journal article supplement (PMC4209847)
Supplement: NIHMS623792-supplement-01.pdf [file NIHMS623792-supplement-01.pdf]

**Supplementary Table 1— Relationship between MEQ Scores and Demographic and Lifestyle Characteristics: Estimated Linear Regression Coefficients ( $\beta$ ), Standard Errors (SE) and p-values**

|                                                          | <i>MEQ Score</i> |       |         |
|----------------------------------------------------------|------------------|-------|---------|
|                                                          | $\beta$          | SE    | p-value |
| <b>Age (years)</b>                                       |                  |       |         |
| 18                                                       | Reference        |       |         |
| 19                                                       | 1.180            | 0.700 | 0.092   |
| 20                                                       | 0.500            | 0.689 | 0.468   |
| 21                                                       | 0.505            | 0.700 | 0.471   |
| 22 and older                                             | 1.056            | 0.721 | 0.143   |
| <b>Sex</b>                                               |                  |       |         |
| Female                                                   | Reference        |       |         |
| Male                                                     | -0.108           | 0.333 | 0.745   |
| <b>Cigarette smoking status</b>                          |                  |       |         |
| Never                                                    | Reference        |       |         |
| Former                                                   | -2.789           | 1.130 | 0.014   |
| Current                                                  | -2.617           | 0.630 | <0.001  |
| <b>Alcohol consumption</b>                               |                  |       |         |
| <1 drink/month                                           | Reference        |       |         |
| 1-19 drinks/month                                        | -2.748           | 0.334 | <0.001  |
| $\geq 20$ drinks/month                                   | -5.745           | 1.192 | <0.001  |
| <b>Obesity (<math>\geq 30.0</math> kg/m<sup>2</sup>)</b> |                  |       |         |
| No                                                       | Reference        |       |         |
| Yes                                                      | -0.778           | 0.704 | 0.269   |
| <b>Any physical activity</b>                             |                  |       |         |
| No                                                       | Reference        |       |         |
| Yes                                                      | 0.169            | 0.357 | 0.636   |
| R <sup>2</sup> =5.1%                                     |                  |       |         |

All coefficients ( $\beta$ ) and standard errors (SE) adjusted for all other covariates in the model

**Supplementary Table 2— Relationship between ESS Scores and Demographic and Lifestyle Characteristics: Estimated Linear Regression Coefficients ( $\beta$ ), Standard Errors (SE) and p-values**

|                                                          | <i>ESS Score</i> |       |         |
|----------------------------------------------------------|------------------|-------|---------|
|                                                          | $\beta$          | SE    | p-value |
| <b>Age (years)</b>                                       |                  |       |         |
| 18                                                       | Reference        |       |         |
| 19                                                       | 0.058            | 0.293 | 0.844   |
| 20                                                       | 0.026            | 0.288 | 0.927   |
| 21                                                       | 0.062            | 0.293 | 0.833   |
| 22 and older                                             | 0.268            | 0.302 | 0.375   |
| <b>Sex</b>                                               |                  |       |         |
| Female                                                   | Reference        |       |         |
| Male                                                     | -0.483           | 0.139 | <0.001  |
| <b>Cigarette smoking status</b>                          |                  |       |         |
| Never                                                    | Reference        |       |         |
| Former                                                   | 0.581            | 0.473 | 0.219   |
| Current                                                  | 0.482            | 0.262 | 0.066   |
| <b>Alcohol consumption</b>                               |                  |       |         |
| <1 drink/month                                           | Reference        |       |         |
| 1-19 drinks/month                                        | 0.353            | 0.139 | 0.011   |
| $\geq 20$ drinks/month                                   | 0.555            | 0.490 | 0.257   |
| <b>Obesity (<math>\geq 30.0</math> kg/m<sup>2</sup>)</b> |                  |       |         |
| No                                                       | Reference        |       |         |
| Yes                                                      | -0.632           | 0.294 | 0.032   |
| <b>Any physical activity</b>                             |                  |       |         |
| No                                                       | Reference        |       |         |
| Yes                                                      | 0.495            | 0.149 | 0.001   |
| R <sup>2</sup> =1.4%                                     |                  |       |         |

All coefficients ( $\beta$ ) and standard errors (SE) adjusted for all other covariates in the model
